# Supplementary material for: MAP3K1 and MAP2K4 mutations are associated with sensitivity to MEK inhibitors in multiple cancer models
Source: PubMed Central journal article supplement (PMC6028652; doi:10.1038/s41422-018-0044-4), 2018-05-24
Supplement: 41422_2018_44_MOESM1_ESM.pdf [file 41422_2018_44_MOESM1_ESM.pdf]

## Figure S1

**a**

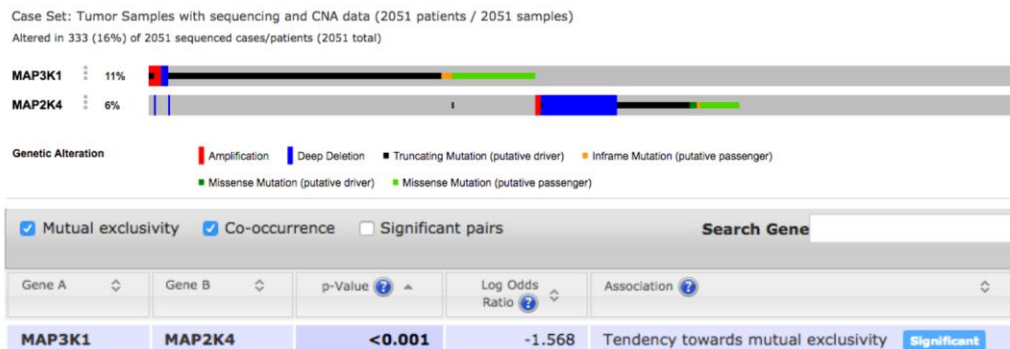

**b**

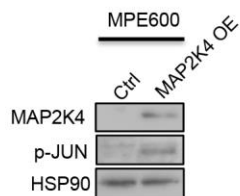

**c**

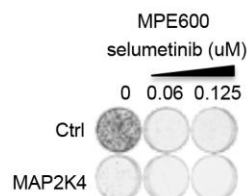

**Figure S1. MAP3K1 and MAP2K4 mutation status.**

**A.** MAP3K1 and MAP2K4 mutation status and mutual exclusivity analysis in METABRIC breast cancer study obtained from <http://www.cbioportal.org>.

**B.** Lysates of control and MAP2K4 overexpression MPE600 cells were western blotted for p-JUN and MAP2K4. HSP90 served as a control.

**C.** Control and MAP2K4 overexpression MPE600 cells were cultured for two weeks in medium containing the indicated concentration of selumetinib. Then cells were fixed and stained.
