# Supplementary material for: MAP3K1 and MAP2K4 mutations are associated with sensitivity to MEK inhibitors in multiple cancer models
Source: PubMed Central journal article supplement (PMC6028652; doi:10.1038/s41422-018-0044-4), 2018-05-24
Supplement: 41422_2018_44_MOESM3_ESM.pdf [file 41422_2018_44_MOESM3_ESM.pdf]

## Figure S3

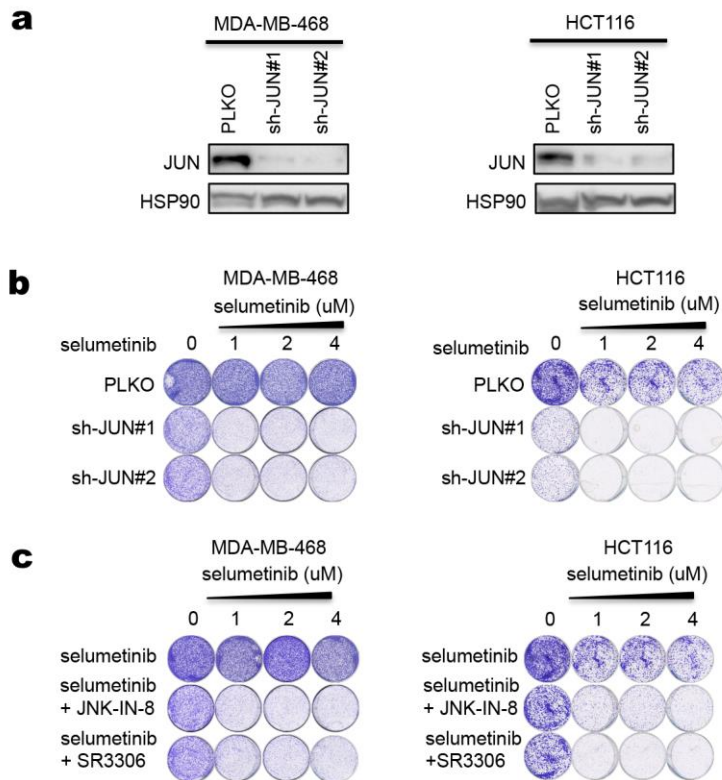

**Figure S3.** *JUN* knockdown confer sensitivity to selumetinib.

**A.** Two individual shRNAs targeting JUN were introduced into MDA-MB-468 and HCT116 cells by lentiviral transduction. JUN knockdown was determined by Western blotting. HSP90 served as a control.

**B.** Control and JUN knockdown MDA-MB-468 and HCT116 cells were cultured for two weeks in medium containing the indicated concentration of selumetinib. Then cells were fixed and stained.

**C.** MDA-MB-468 cells were pretreated with 0.25 $\mu$ M JNK-IN-8 or 0.25 $\mu$ M SR3306 and HCT116 cells were pretreated with 0.5 $\mu$ M JNK-IN-8 or 0.5 $\mu$ M SR3306 for one week. Then cells were seeded and cultured for two weeks in medium containing increasing concentration of selumetinib alone, JNK-IN-8 alone, SR3306 alone, or combination of selumetinib and JNK-IN-8 or SR3306. After this, cells were fixed and stained.
